# Supplementary material
Source: PubMed Central journal article supplement (PMC3909658)
Supplement: NIHMS535789-supplement-Electronic_appendix.pdf [file NIHMS535789-supplement-Electronic_appendix.pdf]

**eFigure 1.** Flowchart of eligibility and inclusion criteria used to define final sample.

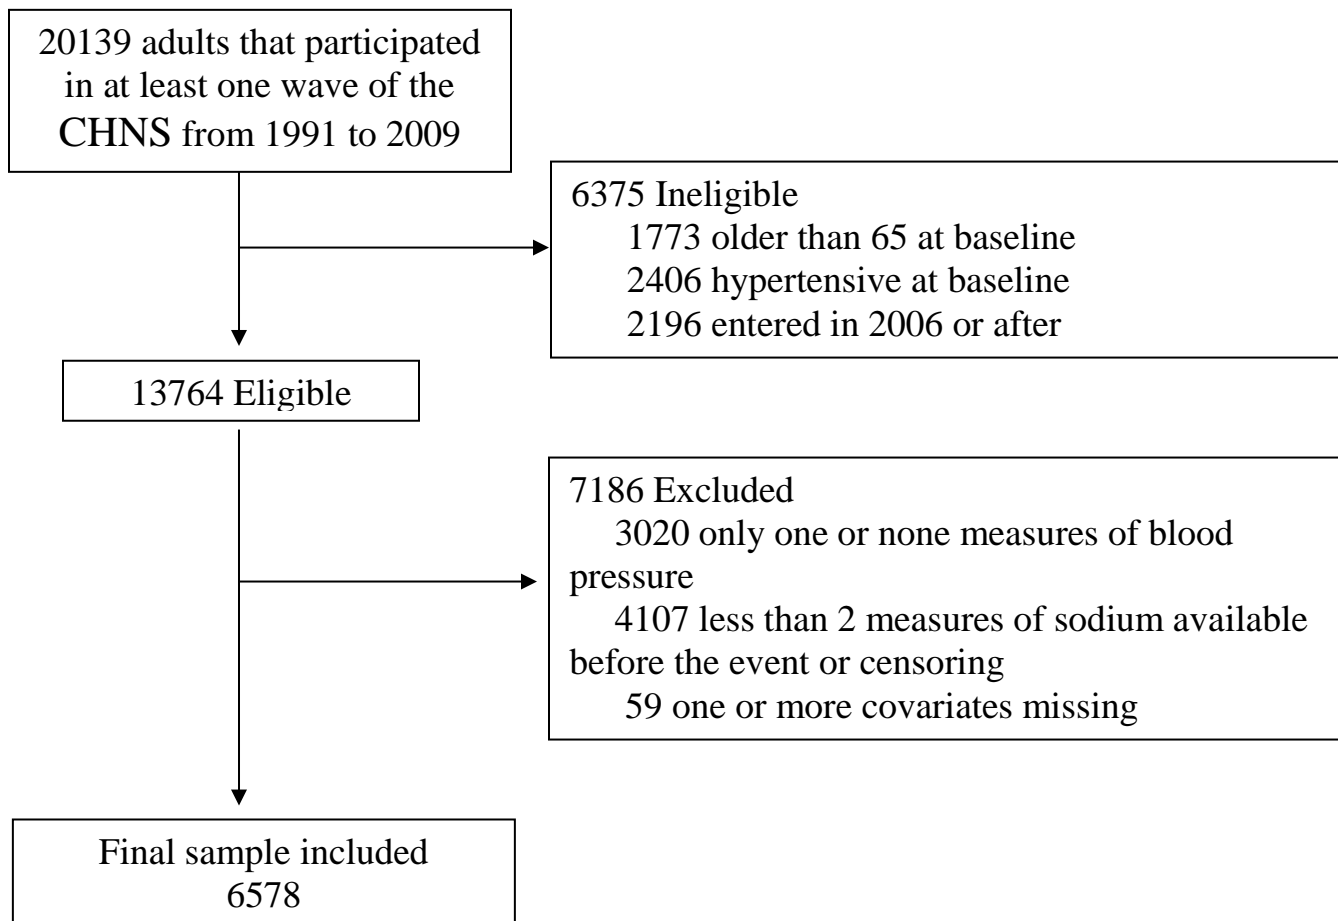

**eTable 1.** Baseline characteristics of subjects included and not included in the final sample.

| Variable                               | Not included<br>(n=7,186) |                 | Included<br>(n=6,578) |                 |
|----------------------------------------|---------------------------|-----------------|-----------------------|-----------------|
|                                        | n                         | mean or percent | n                     | mean or percent |
| Baseline sodium intake (g/d)           | 6,430                     | 6.5             | 6,578                 | 6.3             |
| Gender, %                              |                           |                 |                       |                 |
| Female                                 | 3,700                     | 52              | 3,640                 | 55              |
| Male                                   | 3,481                     | 48              | 2,938                 | 45              |
| Age (years)                            | 7,161                     | 32.6            | 6,578                 | 36.8            |
| Body mass index (kg/m <sup>2</sup> )   | 7,096                     | 21.8            | 6,578                 | 21.7            |
| Region, %                              |                           |                 |                       |                 |
| North                                  | 1,405                     | 20              | 1,150                 | 17              |
| Central                                | 2,461                     | 34              | 2,151                 | 33              |
| South                                  | 3,316                     | 46              | 3,277                 | 50              |
| Residence, %                           |                           |                 |                       |                 |
| Rural                                  | 4,342                     | 60              | 4,801                 | 73              |
| Urban                                  | 2,840                     | 40              | 1,777                 | 27              |
| Highest level of education attained, % |                           |                 |                       |                 |
| None                                   | 964                       | 14              | 1,685                 | 26              |
| Primary school                         | 1,302                     | 19              | 1,510                 | 23              |
| ≥Lower middle school                   | 4,706                     | 68              | 3,383                 | 51              |
| Income <sup>a</sup> , %                |                           |                 |                       |                 |
| Low                                    | 1,807                     | 26              | 2,193                 | 33              |
| Medium                                 | 2,376                     | 34              | 2,203                 | 33              |
| High                                   | 2,739                     | 40              | 2,182                 | 33              |
| Energy intake (kcal/d)                 | 6,907                     | 2,486           | 6,578                 | 2,592           |
| Potassium intake (g/d)                 | 6,429                     | 1.7             | 6,578                 | 1.6             |
| Physical activity <sup>a</sup> , %     |                           |                 |                       |                 |
| Low                                    | 3,249                     | 49              | 2,213                 | 33              |
| Medium                                 | 2,191                     | 33              | 2,190                 | 33              |
| High                                   | 1,143                     | 17              | 2,175                 | 33              |
| Current smoker, %                      |                           |                 |                       |                 |
| No                                     | 5,027                     | 71              | 4,498                 | 68              |
| Yes                                    | 2,072                     | 29              | 2,080                 | 32              |
| Alcohol intake, %                      |                           |                 |                       |                 |
| <3 times/week                          | 6,240                     | 89              | 5,719                 | 87              |
| ≥3 times/week                          | 802                       | 11              | 859                   | 13              |
| Wave of entry, %                       |                           |                 |                       |                 |
| 1991                                   | 2,783                     | 39              | 3,777                 | 57              |
| 1993                                   | 843                       | 12              | 574                   | 9               |
| 1997                                   | 1,416                     | 20              | 1,216                 | 18              |
| 2000                                   | 1,059                     | 15              | 641                   | 10              |
| 2004                                   | 1,083                     | 15              | 370                   | 6               |

<sup>a</sup>Low, medium and high cutoff values were based on tertiles of the sample included.

**eTable 2.** Correlation coefficients of sodium intake and other dietary covariates

| <b>Dietary covariates<sup>a</sup></b> | <b>Baseline Sodium</b> | <b>Mean Sodium</b> | <b>Recent Sodium</b> |
|---------------------------------------|------------------------|--------------------|----------------------|
| Energy, kcal/d                        | 0.26                   | 0.31               | 0.23                 |
| Fat, g/d                              | 0.17                   | 0.17               | 0.19                 |
| Protein, g/d                          | 0.24                   | 0.32               | 0.23                 |
| Potassium, mg/d                       | 0.15                   | 0.18               | 0.17                 |
| Calcium, mg/d                         | 0.18                   | 0.21               | 0.17                 |
| Magnesium, mg/d                       | 0.21                   | 0.29               | 0.24                 |
| Red meat, g/d                         | 0.06                   | 0.02               | 0.04                 |
| Fruits and vegetables, g/d            | 0.08                   | 0.08               | 0.05                 |
| Cakes, cookies & pastries g/d         | 0.00                   | -0.02              | 0.00                 |
| Fish, g/d                             | 0.03                   | 0.05               | 0.03                 |
| Poultry, g/d                          | 0.02                   | 0.01               | 0.02                 |
| Nuts and seeds, g/d                   | 0.04                   | 0.07               | 0.05                 |

<sup>a</sup> Dietary covariates are from baseline, mean or recent measure respectively

**eTable 3.** Results from different sensitivity analysis: Cumulative Risk Difference at 11 years of follow-up and Hazard Ratios for incident hypertension comparing to the lowest sodium intake group.

|                                               | Baseline sodium intake | Mean sodium intake                  | Recent sodium intake |
|-----------------------------------------------|------------------------|-------------------------------------|----------------------|
|                                               | Cumulative Risk        | Cumulative Risk Difference (95% CI) |                      |
| <i>A) 1<sup>st</sup> Sensitivity analysis</i> |                        |                                     |                      |
| G1 (<3.7 g/d)                                 | 0.20                   | 0                                   |                      |
| G2 (3.7 – 5.2 g/d)                            | 0.19                   | -0.01 (-0.06, 0.04)                 |                      |
| G3 (5.2 – 6.6 g/d)                            | 0.16                   | -0.04 (-0.09, 0.02)                 |                      |
| G4 (6.6 – 8.7 g/d)                            | 0.18                   | -0.02 (-0.08, 0.03)                 |                      |
| G5 (>8.7 g/d)                                 | 0.18                   | -0.03 (-0.06, 0.01)                 |                      |
|                                               | HR (95% CI)            | HR (95% CI)                         | HR (95% CI)          |
| <i>B) 2<sup>nd</sup> Sensitivity analysis</i> |                        |                                     |                      |
| G1 (<3.7 g/d)                                 | 1                      |                                     |                      |
| G2 (3.7 – 5.2 g/d)                            | 0.97 (0.82, 1.14)      |                                     |                      |
| G3 (5.2 – 6.6 g/d)                            | 0.88 (0.74, 1.04)      |                                     |                      |
| G4 (6.6 – 8.7 g/d)                            | 0.96 (0.81, 1.14)      |                                     |                      |
| G5 (>8.7 g/d)                                 | 1.06 (0.90, 1.26)      |                                     |                      |
| <i>C) 3<sup>rd</sup> Sensitivity analysis</i> |                        |                                     |                      |
| G1 (<3.7 g/d)                                 | 1                      | 1                                   | 1                    |
| G2 (3.7 – 5.2 g/d)                            | 0.84 (0.64, 1.09)      | 0.76 (0.56, 1.03)                   | 1.20 (0.94, 1.53)    |
| G3 (5.2 – 6.6 g/d)                            | 0.66 (0.50, 0.87)      | 0.86 (0.63, 1.17)                   | 1.66 (1.27, 2.15)    |
| G4 (6.6 – 8.7 g/d)                            | 0.77 (0.59, 1.01)      | 1.18 (0.85, 1.64)                   | 2.34 (1.77, 3.10)    |
| G5 (>8.7 g/d)                                 | 1.03 (0.79, 1.35)      | 1.76 (1.20, 2.59)                   | 2.16 (1.61, 2.90)    |
| <i>D) 4<sup>th</sup> Sensitivity analysis</i> |                        |                                     |                      |
| G1 (<3.7 g/d)a                                |                        | 1                                   | 1                    |
| G2 (3.7 – 5.2 g/d)                            |                        | 0.98 (0.77, 1.24)                   | 1.06 (0.87, 1.31)    |
| G3 (5.2 – 6.6 g/d)                            |                        | 0.99 (0.78, 1.26)                   | 1.16 (0.93, 1.43)    |
| G4 (6.6 – 8.7 g/d)                            |                        | 1.18 (0.93, 1.51)                   | 1.40 (1.13, 1.75)    |
| G5 (>8.7 g/d)                                 |                        | 1.25 (0.95, 1.63)                   | 1.21 (0.97, 1.51)    |

All sensitivity analysis were adjusted for the following covariates: age, BMI, gender, region, urban/rural, education level, income, physical activity, wave of entry, smoking and alcohol intake at baseline; and for energy and potassium intake at baseline, mean or recent period accordingly.

A) 1<sup>st</sup> Sensitivity analysis: Data from 12,159 subjects (5581 excluded and 6578 included) was used to generate inverse probability weights for selection. Two logistic regressions were run to estimate the probability of selection [Pr(X=x)] and the probability of selection conditional on the covariates [Pr(X=x | Z)], then the stabilized weights were calculated as Pr(X=x) / Pr(X=x | Z). These weights were incorporated in *proc lifereg* to estimate the cumulative risks using the Turnbull estimator. Nonparametric bootstrap was used to estimate the standard error of the risk difference. Analysis not performed for mean or recent sodium, because the majority of excluded had only baseline sodium.

B) 2<sup>nd</sup> Sensitivity analysis: Included all subjects with at least one sodium measure (N=10,017), instead of at least two sodium measures (as in the main analysis). This was performed to ascertain if requiring two

---

sodium measures biased the results, particularly because the reason why many subjects did not have at least two sodium measurements was that they were classified as hypertensive early in the study, and hence they had a short follow-up period with only one available sodium measure. This was also estimated only for baseline sodium.

D) 3th Sensitivity analysis: Participants were censored at first missing wave of BP and excluded if they had any wave with sodium missing and/or less than two sodium measurements before censoring (N=3835).

E) 4th Sensitivity analysis: Included same sample as in the main analysis, but only the first two sodium measures were used. Mean sodium is the mean of the first two measures, and recent sodium is the second measure (baseline sodium is not shown here because it remained the same as in the main analysis).

CI, confidence interval; G, group.

---
